# Supplementary material for: Hydrothermal synthesis of delafossite CuScO2 hexagonal plates as an electrocatalyst for the alkaline oxygen evolution reaction
Source: Royal Society of Chemistry journal article supplement (doi:10.1039/c9dt04791c), 2020-01-01
Supplement: c9dt04791c1.pdf [file c9dt04791c1.pdf]

## **Hydrothermal synthesis of delafossite $\text{CuScO}_2$ hexagonal plates as electrocatalyst for the alkaline oxygen evolution reaction**

Yanwen Deng,<sup>a</sup> Dehua Xiong,<sup>\*,a</sup> Han Gao,<sup>a</sup> Jie Wu,<sup>a</sup> Santosh Kumar Verma,<sup>b</sup> Baoshun Liu,<sup>a</sup> and Xiujian Zhao<sup>\*,a</sup>

<sup>a</sup> State Key Laboratory of Silicate Materials for Architectures, Wuhan University of Technology, Wuhan 430070, P. R. China

\* Corresponding author Email: xiongdehua2010@gmail.com (Dehua Xiong), opluse@whut.edu.cn (Xiujian Zhao)

<sup>b</sup> Department of Chemistry and Chemical Engineering, Yulin University, Yulin 719000, P. R. China

## Experimental details:

### Materials synthesis

All chemicals used in the experiments were purchased from Sinopharm Chemical Reagent Co., Ltd with analytical grade and used as received without further purification.  $\text{CuScO}_2$  were prepared according to a procedure reported in our previous works (*J. Mater. Chem.*, 2012, 22, 24760-24768; *New J. Chem.*, 2016, 40, 6498-6504; *Inorg. Chem. Front.*, 2018, 5, 183-188.). Typically, 15 mmol  $\text{Cu}(\text{NO}_3)_2 \cdot 3\text{H}_2\text{O}$  and 15 mmol  $\text{Sc}(\text{NO}_3)_3 \cdot x\text{H}_2\text{O}$  were dissolved sequentially in 70 ml deionized water at room temperature, 0.50 ml ethylene glycol and 5.00 g NaOH was added to the above solution for preparing the hydrothermal precursor. The mixture was stirred for 30 minutes at room temperature until a homogeneous suspension formed, and then the solution was loaded into a 100 mL Teflon-lined autoclave reactor which was kept at 240 °C in an oven for 24 hours. Subsequently, the autoclave reactor was naturally cooled down to room temperature. The as-obtained precipitates were collected and washed with diluted ammonia aqueous solution, deionized water and ethanol for 3 times to remove any byproduct impurities. Finally, the as-obtained  $\text{CuScO}_2$  powders were dried at 60 °C for 12 hours for further characterization.

### Structural characterization

The morphology, microstructure, and chemical composition of  $\text{CuScO}_2$  powders were examined by field-emission scanning electron microscopy (FESEM, FEG Quanta 450) equipped with energy-dispersive X-ray

spectroscopy (EDX). The crystalline structure of CuScO<sub>2</sub> powders was studied by X-ray diffractometry (XRD, PANalytical X'Pert PRO) using Cu K<sub>α</sub> radiation ( $\lambda = 1.540598 \text{ \AA}$ ) and a PIXcel detector. The surface chemical states of CuScO<sub>2</sub> powders were analyzed by X-ray photoelectron spectroscopy (XPS, Thermo Escalab 250Xi), and the C (1s) line (at 284.80 eV) corresponding to the surface adventitious carbon (C–C line bond) has been used as the reference binding energy. The thermal stability of CuScO<sub>2</sub> powders was investigated by a differential scanning calorimetry-thermogravimetry analyzer (DSC-TG, Diamond TG/DTA, Perkin-Elmer Instruments) from 25 °C to 1000 °C at a heating rate of 10 °C/min under air atmosphere.

### **Electrochemical measurements**

The electrocatalytic activity towards oxygen evolution reaction was evaluated by cyclic voltammetry (CV) scan in a three-electrode configuration in 1.0 M KOH (pH = 13.5) using a CS2350H electrochemical workstation (Wuhan Corrtest Instruments Corp., China). A platinum wire and a saturated calomel electrode (SCE) were used as the counter and reference electrodes, respectively. The Ni@CuScO<sub>2</sub> working electrodes were fabricated as follows: CuScO<sub>2</sub> powders were dispersed in a mixture of 500  $\mu\text{L}$  water, 480  $\mu\text{L}$  isopropanol and 20  $\mu\text{L}$  Nafion (5 wt%, Sigma), and cast onto a piece of nickel foam (the working area is  $10 \times 10 \text{ mm}^2$ ). The CuScO<sub>2</sub> loading mass was kept as 0.15, 0.30, and 0.45  $\text{mg cm}^{-2}$ , these working electrodes were denoted as Ni@CuScO<sub>2</sub>-0.15, Ni@CuScO<sub>2</sub>-0.30, and Ni@CuScO<sub>2</sub>-0.45. Cyclic voltammetric (CV)

scans were recorded between 1.00 and 1.90 V *vs.* reversible hydrogen electrode (RHE) at a scan rate of 5 mV s<sup>-1</sup>.

All current density values are normalized with respect to the geometrical surface area of the working electrode. All CV curves presented in this work are *iR*-corrected (85%). The correction was done according to the following equation:

$$E_c = E_m - iR_s \quad (1)$$

where  $E_c$  is the *iR*-corrected potential,  $E_m$  experimentally measured potential, and  $R_s$  the equivalent series resistance extracted from the electrochemical impedance spectroscopy measurements. Unless otherwise specified, all potentials are reported versus reversible hydrogen electrode (RHE) by converting the potentials measured *vs.* SCE according to the following formula:

$$E \text{ (RHE)} = E \text{ (SCE)} + 0.241 + 0.059 \text{ pH} \quad (2)$$

Supplementary figures:

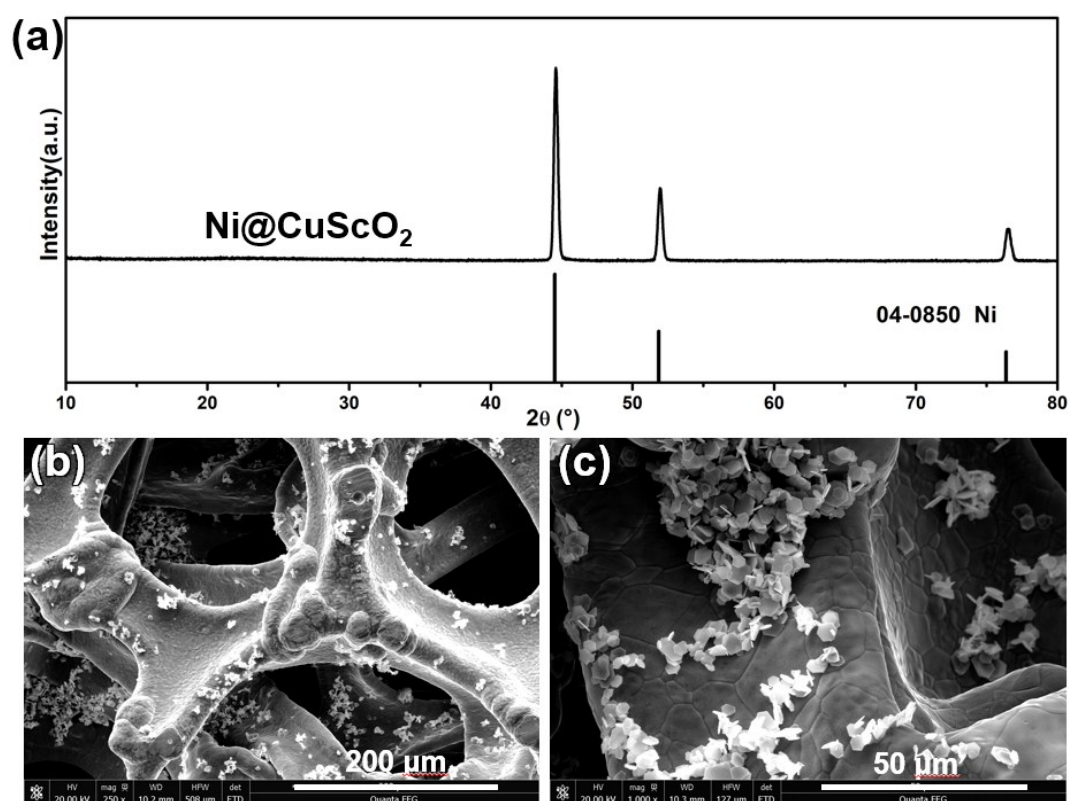

Fig. S1. XRD patterns (a) and SEM images (b, c) of  $\text{Ni@CuScO}_2$ -0.30 working electrodes.

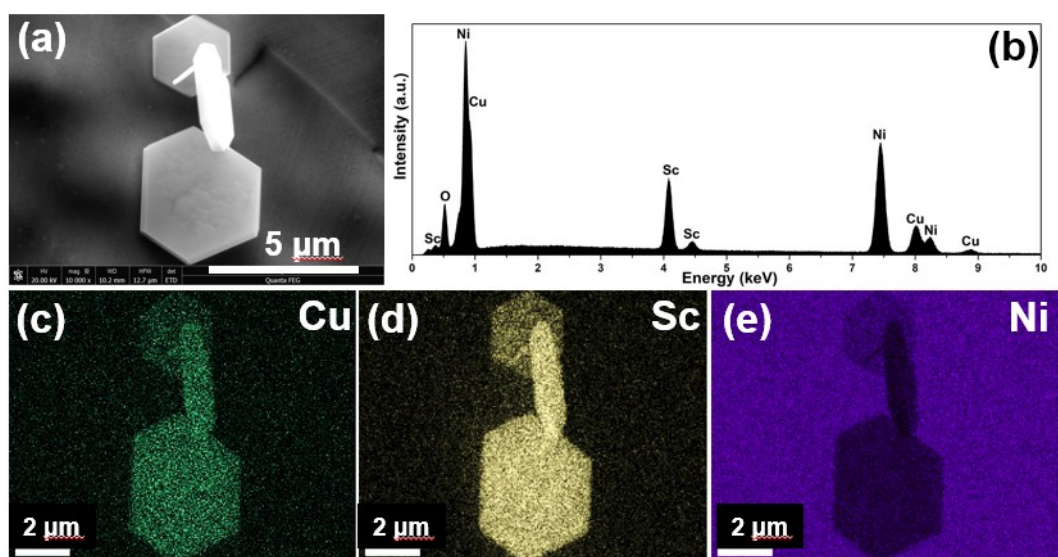

Fig. S2. SEM image (a), EDX spectrum (b) and elemental maps (c, Cu; d, Sc; e, Ni) of Ni@CuScO<sub>2</sub>-0.30 working electrodes.

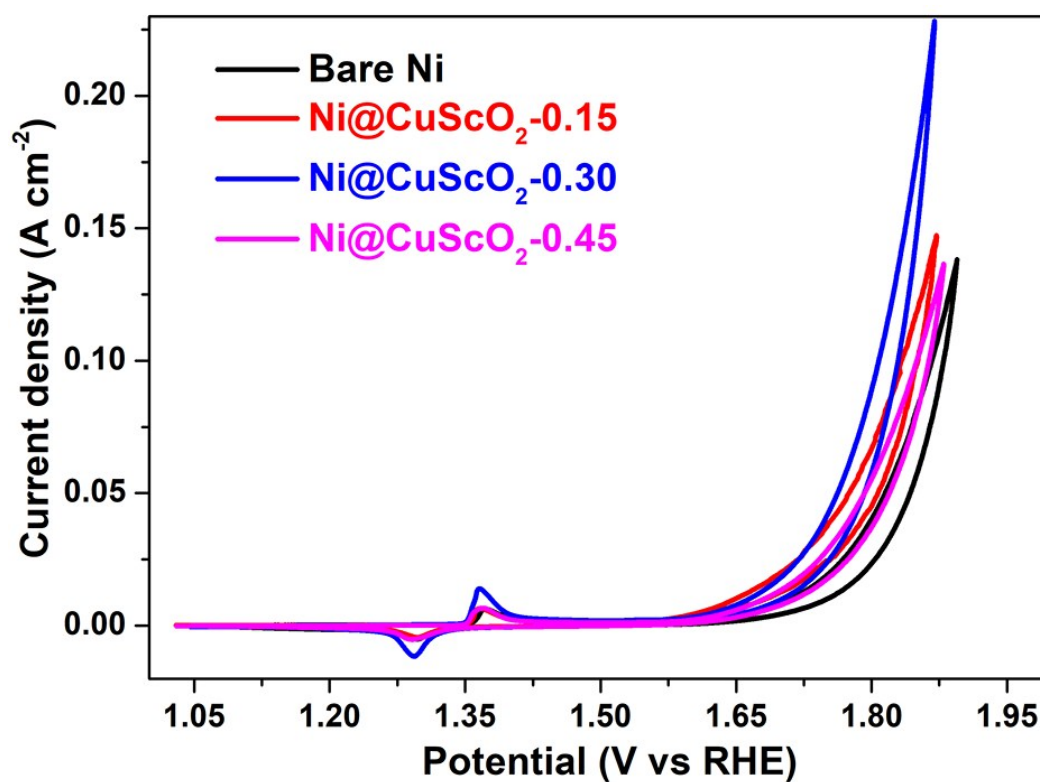

Fig. S3. CV curves recorded at a scan rate of 5 mV s<sup>-1</sup> in the potential range of 1.00 to 1.90 V vs RHE, and the loading mass of Ni@CuScO<sub>2</sub> working electrodes were 0.15, 0.30, and 0.45 mg cm<sup>-2</sup>.

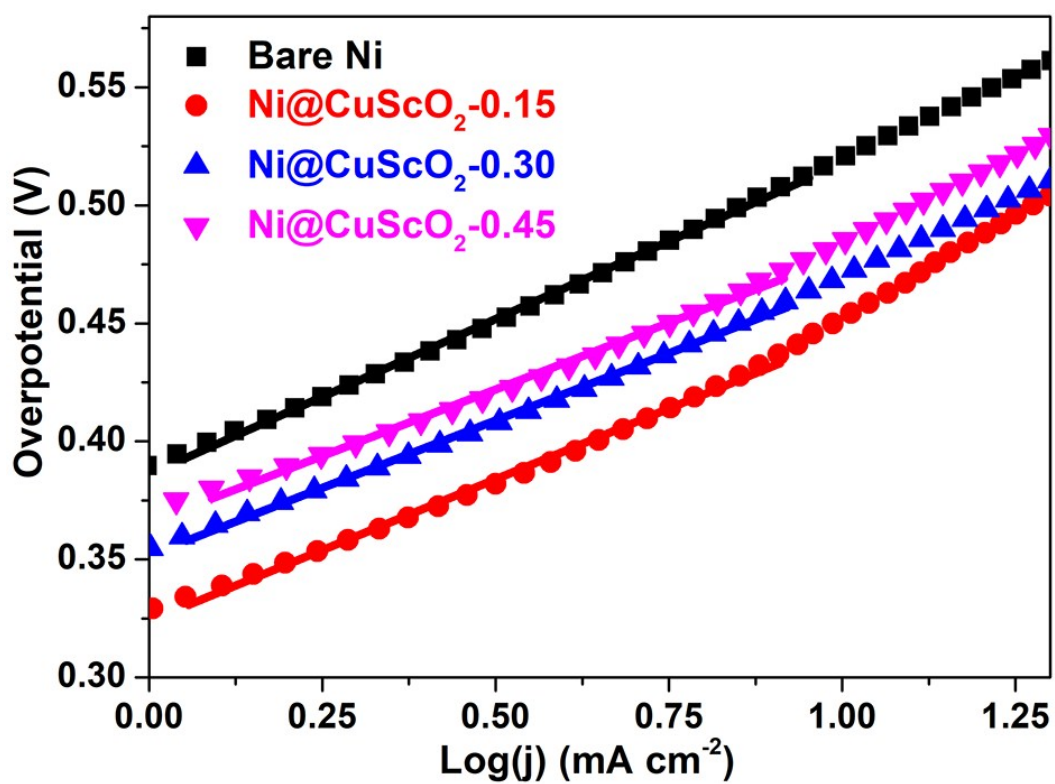

Fig. S4. Tafel plots of the bare Ni and Ni@CuScO<sub>2</sub> working electrodes.



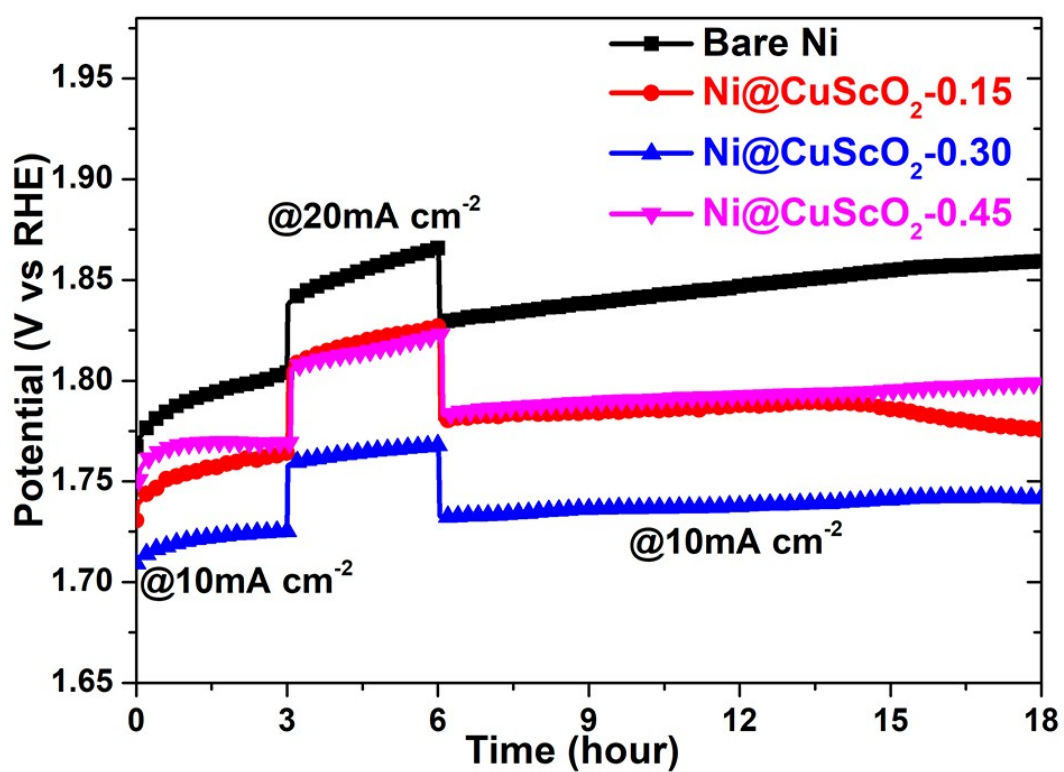

Fig. S5. Chronopotentiometric curves of bare Ni and Ni@CuScO<sub>2</sub> working electrodes measured for 18 hours.

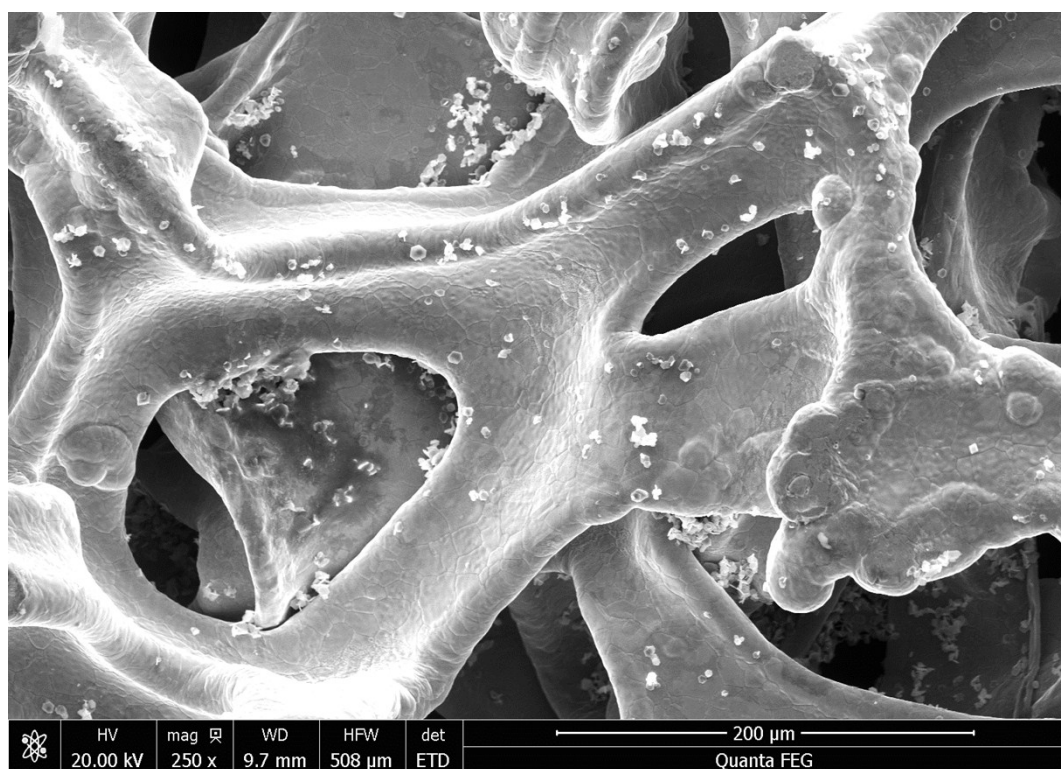

Fig. S6. SEM image of Ni@CuScO<sub>2</sub>-0.30 working electrodes after long-term stability test for 18 hours under OER conditions.

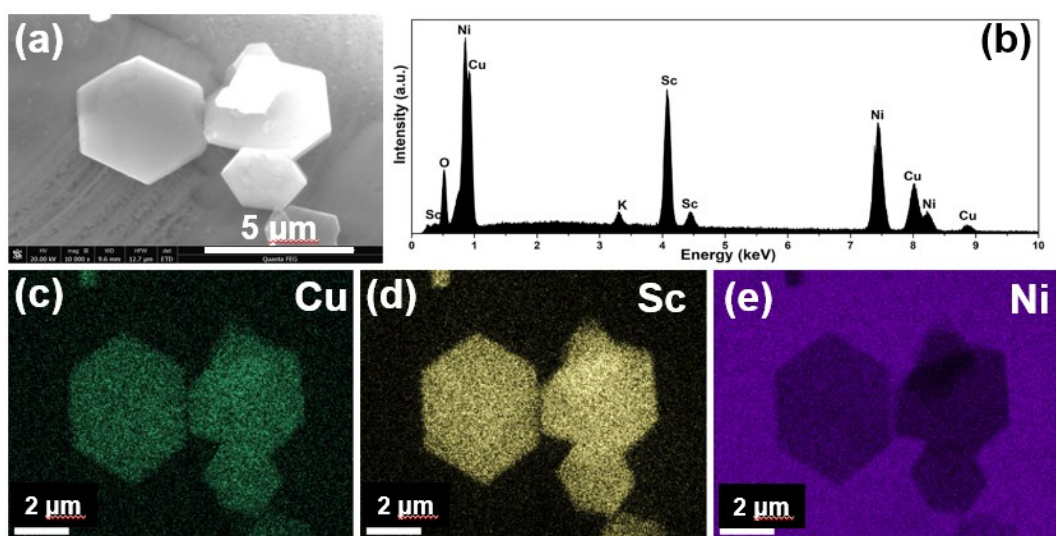

Fig. S7. SEM image (a), EDX spectrum (b) and elemental maps (c, Cu; d, Sc; e, Ni) of Ni@CuScO<sub>2</sub>-0.30 working electrodes after long-term stability test for 18 hours under OER conditions.

## Supplementary Table:

**Table S1.** The OER activity of Ni@CuScO<sub>2</sub> electrodes in comparison to that of other ternary metal oxides based OER catalysts recently reported in the literatures.

| Catalysts                                                            | Electrolyte   | Loadin<br>g mass<br>(mg<br>cm <sup>-2</sup> ) | Tafel<br>slope<br>(mV dec <sup>-1</sup> ) | $J_{geo}$<br>(current<br>density in mA<br>cm <sup>-2</sup><br>@overpotentia<br>l in mV) | Reference                                              |
|----------------------------------------------------------------------|---------------|-----------------------------------------------|-------------------------------------------|-----------------------------------------------------------------------------------------|--------------------------------------------------------|
| Ni@CuScO <sub>2</sub>                                                | 1.0 M<br>KOH  | 0                                             | 132                                       | 10@η=520<br>20@η=570                                                                    | This work                                              |
|                                                                      |               | 0.30                                          | 114                                       | 10@η=470<br>20@η=510                                                                    |                                                        |
| 5%-La-excess<br>LaNiO <sub>3</sub>                                   | 0.1 M<br>KOH  | -                                             | ~70                                       | 0.042@η=400                                                                             | <i>Nano Lett.</i> 2017,<br>17, 3126-3132.              |
| 5%-Ni-excess<br>LaNiO <sub>3</sub>                                   |               |                                               | ~70                                       | 0.121@η=400                                                                             |                                                        |
| LaCoO <sub>3</sub> -bulk                                             | 0.1 M<br>KOH  | 0.25                                          | 102                                       | 10@η=620                                                                                | <i>Nat. Commun.</i> ,<br>2016, 7, 11510.               |
| LaCoO <sub>3</sub> - 60 nm                                           |               |                                               | 78                                        | 10@η=550                                                                                |                                                        |
| LaCoO <sub>3</sub> - 80 nm                                           |               |                                               | 69                                        | 10@η=490                                                                                |                                                        |
| LaCoO <sub>3</sub> - 200 nm                                          |               |                                               | 89                                        | 10@η=540                                                                                |                                                        |
| LaFeO <sub>3</sub>                                                   | 0.1 M<br>KOH  | 0.464                                         | 77                                        | 10@η=510                                                                                | <i>Chem. Mater.</i><br>2016, 28, 1691-<br>1697.        |
| La <sub>0.95</sub> FeO <sub>3-δ</sub>                                |               |                                               | 48                                        | 1@η=320<br>10@η=410                                                                     |                                                        |
| SrCoO <sub>3</sub>                                                   | 0.1 M<br>KOH  | -                                             | 145                                       | 0.7@η=350                                                                               | <i>Mater. Horiz.</i> ,<br>2015, 2, 495-501.            |
| SrSc <sub>0.025</sub> Nb <sub>0.025</sub> Co<br>0.95O <sub>3-δ</sub> |               |                                               | ~70                                       | 10@η=350                                                                                |                                                        |
| LiCoO <sub>2</sub><br>20–100 nm                                      | 1.0 M<br>NaOH | 0.32                                          | 48 ± 3                                    | 10@η=430±14                                                                             | <i>Energy Environ.<br/>Sci.</i> , 2016, 9,<br>184-192. |
| LiCoO <sub>2</sub><br>50–150 nm                                      |               | 1.20                                          | 49 ± 3                                    | 10@η=430 ± 8                                                                            |                                                        |
| CuRhO <sub>2</sub>                                                   | 1.0 M<br>KOH  | 20<br>μmol/c<br>m <sup>2</sup>                | -                                         | 10@η=420                                                                                | <i>J. Phys. Chem. C</i><br>2015, 119, 6495-<br>6501.   |
| CuCrO <sub>2</sub>                                                   |               |                                               | -                                         | 5@η=710                                                                                 |                                                        |
| CuCoO <sub>2</sub>                                                   |               |                                               | -                                         | 10@η=430                                                                                |                                                        |
| CuFeO <sub>2</sub>                                                   |               |                                               | -                                         | 5@η=670                                                                                 |                                                        |
| CuCoO <sub>2</sub>                                                   | 1.0 M<br>KOH  | 0.30                                          | 93                                        | 1@η=390<br>10@η=440                                                                     | <i>Inorg. Chem.<br/>Front.</i> , 2018,5,<br>183-188.   |
| CuMnO <sub>2</sub>                                                   | 1.0 M         | 0.05                                          | -                                         | 12.3@ 2.0 V                                                                             | <i>Journal of The</i>                                  |

*Supplementary information*

|                                                                    |               |       |      |                                          |                                                          |
|--------------------------------------------------------------------|---------------|-------|------|------------------------------------------|----------------------------------------------------------|
|                                                                    | KOH           |       |      | vs. Ag/AgCl<br>10@ 1.69 V<br>vs. Ag/AgCl | <i>Electrochemical Society</i> , 2019,166 (6) H233-H242. |
| NiCo <sub>2</sub> O <sub>4</sub>                                   | 1.0 M<br>KOH  | -     | 75   | 10@η=460                                 | <i>Appl. Surf. Sci.</i> , 2017, 416, 371-378.            |
| Fe <sub>0.5</sub> Ni <sub>0.5</sub> Co <sub>2</sub> O <sub>4</sub> |               |       | 27   | 10@η=350                                 |                                                          |
| ZnCo <sub>2</sub> O <sub>4</sub>                                   | 0.1 M<br>KOH  | 0.051 | 38.5 | 20@η=420                                 | <i>J. Mater. Chem. A</i> , 2016, 4, 10014-10022.         |
| Ni-Mn-O<br>nanomeshs                                               | 0.1 M<br>KOH  | 1±0.2 | 41   | 10@η=372                                 | <i>Electrochimica Acta</i> , 2017, 245, 32-40.           |
| Ni-Mn-O<br>nanoparticles                                           |               |       | 59   | 10@η=275                                 |                                                          |
| CoFe <sub>2</sub> O <sub>4</sub><br>thin films                     | 1.0 M<br>NaOH | -     | 54.2 | 10@η=490                                 | <i>Electrochem. Commun.</i> , 2018, 87, 1-4.             |
